# Supplementary material for: 5-Fluoroindole Reduces the Bacterial Burden in a Murine Model of Mycobacterium tuberculosis Infection
Source: PubMed Central journal article supplement (PMC11292626; doi:10.1021/acsomega.4c03981), 2024-07-16
Supplement: ao4c03981_si_001.pdf [file ao4c03981_si_001.pdf]

# 5-Fluoroindole reduces the bacterial burden in a murine model of *Mycobacterium tuberculosis* infection

*Christiano E. Neves<sup>a,b</sup>, Josiane D. Paz<sup>a,b</sup>, Bruno L. Abbad<sup>a</sup>, Raoní S. Rambo<sup>a</sup>, Alexia M. Czezo<sup>a,b</sup>, Nathalia D. M. Sperotto<sup>a</sup>, Adilio S. Dadda<sup>a</sup>, Rodrigo B. M. Silva<sup>a</sup>, Marcia A. Perelló<sup>a</sup>, Guilherme A. Gonçalves<sup>a,c</sup>, Laura C. González<sup>a,b</sup>, Cristiano V. Bizarro<sup>a,b</sup>, Pablo Machado<sup>a,b,c\*</sup>, Luiz A. Basso<sup>a,b,c\*</sup>*

*<sup>a</sup>Instituto Nacional de Ciência e Tecnologia em Tuberculose, Centro de Pesquisas em Biologia Molecular e Funcional, Pontifícia Universidade Católica do Rio Grande do Sul, 90616-900, Porto Alegre, Rio Grande do Sul, Brazil*

*<sup>b</sup>Programa de Pós-Graduação em Biologia Celular e Molecular, Pontifícia Universidade Católica do Rio Grande do Sul, 90616-900, Porto Alegre, Rio Grande do Sul, Brazil*

*<sup>c</sup>Programa de Pós-Graduação em Medicina e Ciências da Saúde, Pontifícia Universidade Católica do Rio Grande do Sul, 90616-900, Porto Alegre, Rio Grande do Sul, Brazil*

## Table of contents

|                                             |    |
|---------------------------------------------|----|
| Spreading pattern in the REMA assay .....   | S1 |
| FTIR spectra of synthesized compounds ..... | S2 |



**Figure S2.** FTIR spectra comparing 5-FI/5FI.HCL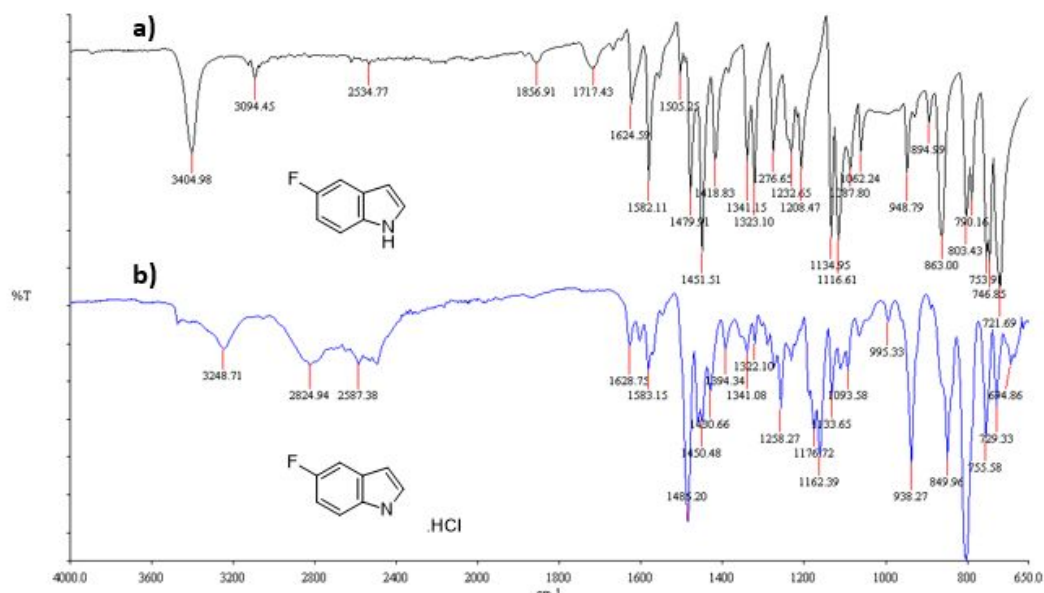**Figure S2:** (a) 5-FI FTIR spectra. (b) 5-FI.HCl FTIR spectra.
